1 **Differential expression of soluble receptor for advanced glycation end-products (sRAGE) in**  
2 **mice susceptible or resistant to chronic colitis**

3

4 Michael Bramhall<sup>1,2</sup>, Kevin Rich<sup>2</sup>, Ajanta Chakraborty<sup>2</sup>, Larisa Logunova<sup>2</sup>, Namshik Han<sup>3,4</sup>,  
5 James Wilson<sup>5</sup>, Catherine Booth<sup>5</sup>, John Mclaughlin<sup>3,6</sup>, Andy Brass<sup>3</sup>, Sheena M. Cruickshank<sup>2</sup>

6

7 **Author Affiliations:**

8 <sup>1</sup>Department of Biochemistry and Molecular Biology, School of Biomedical Sciences, Monash  
9 University, Clayton, Victoria 3800, Australia

10 <sup>2</sup>Lydia Becker Institute of Immunology and Inflammation, Manchester Academic Health  
11 Science Centre, School of Biological Sciences, Faculty of Biology, Medicine, and  
12 Health, University of Manchester, Manchester M13 9PT, UK

13 <sup>3</sup>Manchester Academic Health Science Centre, School of Medical Sciences, The University of  
14 Manchester, Manchester M13 9PT, UK

15 <sup>4</sup>The Gurdon Institute, University of Cambridge, Cambridge CB2 1QN, UK

16 <sup>5</sup>Epistem Ltd., Manchester M13 9XX, UK

17 <sup>6</sup>Salford Royal NHS Foundation Trust, Salford M6 8HD UK

18 **Running title: Markers of protective responses in colitis**

19

20 **Corresponding Author**

21 S. M. Cruickshank, AV Hill Building, University of Manchester, Manchester M13 9PT, UK

22 [sheena.cruickshank@manchester.ac.uk](mailto:sheena.cruickshank@manchester.ac.uk),

Phone +44 (0)161 275 1578

23 **Abstract**

24 **Aims:** Identifying the factors that contribute to chronicity in inflamed colitic tissue is not  
25 trivial. However, in mouse models of colitis, we can investigate at preclinical timepoints. We  
26 sought to validate murine *Trichuris muris* infection as a model for identification of factors  
27 that promote development of chronic colitis.

28 **Methods:** We compared preclinical changes in mice with a resolving immune response to *T.*  
29 *muris* (resistant) versus mice that fail to expel the worms and develop chronic colitis  
30 (susceptible). Findings were then validated in healthy controls and patients with suspected  
31 or confirmed IBD.

32 **Results:** The Receptor for Advanced Glycation End Products (*Rage*) was highly dysregulated  
33 between resistant and susceptible mice prior to the onset of any pathological signs.  
34 Increased soluble RAGE (sRAGE) in the serum and faeces of resistant mice correlated with  
35 reduced colitis scores. Mouse model findings were validated in a preliminary clinical study:  
36 faecal sRAGE was differentially expressed in patients with active IBD compared with IBD in  
37 remission, patients with IBD excluded or healthy controls.

38 **Conclusion:** Pre-clinical changes in mouse models can identify early pathways in the  
39 development of chronic inflammation that human studies cannot. We identified the decoy  
40 receptor sRAGE as a potential mechanism for protection against chronic inflammation in  
41 colitis in mice and humans. We propose that the RAGE pathway is clinically relevant in the  
42 onset of chronic colitis, and that further study of sRAGE in IBD may provide a novel  
43 diagnostic and therapeutic target.

44

45 **Keywords:** sRAGE, colitis, mouse

46

## 47 **Introduction**

48 Inflammatory bowel diseases (IBD) are a group of intestinal immune disorders, including  
49 Crohn's disease (CD) and ulcerative colitis (UC), that cause chronic inflammation in the gut  
50 [1]. The cause of IBD is currently not known, but dysregulation of intestinal immunity,  
51 microbial dysbiosis, genetics and environmental factors contribute to disease onset.  
52 Unpredictable cycles of remission and relapse require careful monitoring and the long-term  
53 damage from inflammation often warrants potent immunomodulatory therapy or surgical  
54 intervention [2].

55 It is impossible to reliably predict onset, relapse or remission of IBD [3] and currently, only  
56 animal models provide a means of studying the perturbations in the gut that precede colitis.  
57 Infecting susceptible mouse strains with the enteric nematode parasite *Trichuris muris*  
58 closely parallels human Crohn's disease in both the pathological and transcriptional changes  
59 induced [4] and has been established as a model for the study of the initiation of immune  
60 responses in the colon [5]. *T. muris* resistant BALB/c and C57BL6 mice mount an early  
61 immune response against the worms within 24 hours of infection, with large numbers of  
62 dendritic cells (DCs) migrating to the lamina propria, whereas AKR mice or C57BL/6 mice  
63 with a low dose infection mount a delayed immune response, resulting in chronic intestinal  
64 inflammation and a failure to expel the worms [5, 6]. Both susceptible and resistant strains  
65 show mild signs of inflammation within 24 hours. However, inflammation in resistant mice is  
66 controlled and ultimately resolves, whereas susceptible strains go on to develop clinical  
67 colitis in the subsequent weeks post infection.

68 Exploiting these early differences in the host immune response to *T. muris* infection  
69 experimentally may provide information on the factors that promote the onset of chronic,  
70 rather than resolving, inflammation in the gut [7]. Early factors are impossible to distinguish

71 from the inflammatory milieu present in IBD patients at the point of diagnosis as chronic  
72 inflammation is already well established. Identification and validation of early changes  
73 during chronic colitis onset in mice could provide a useful pipeline for developing diagnostic  
74 and disease-management biomarkers or therapeutic targets in human colitis.

75 In this study, we carried out a *T. muris* infection study, investigating preclinical  
76 transcriptional changes 24 hours post infection (PI). We identified the receptor for advanced  
77 glycation end-products (*Rage*) as highly upregulated in mice susceptible to *T. muris*  
78 infection. We further investigated the presence of RAGE and related ligands in colitic mice  
79 and carried out a translational validation study investigating the presence of soluble RAGE  
80 (sRAGE) in the faeces of IBD patients and healthy controls.

81

## 82 **Materials and methods**

### 83 **Mice**

84 All animal procedures used in this project were carried out in accordance with the UK  
85 Animals (Scientific Procedures) Act, 1986. For *T. muris* infection experiments, 6-8 week old  
86 male BALB/c and AKR mice were used (Harlan UK, Bicester, UK). Mice were housed in  
87 individually ventilated cages with nesting material and were maintained under constant 12h  
88 light–dark cycle at 21-23 °C with free access to water and standard chow (Beekay Rat and  
89 Mouse Diet, Bantin & Kingham, Hull, UK). Euthanasia was carried out by schedule 1  
90 procedure of CO<sub>2</sub> asphyxiation followed by cervical dislocation or exsanguination. 3-6 mice  
91 were used per strain, per time point studied.

### 92 **Parasites and infection**

93 Professor Kathryn Else, The University of Manchester, kindly provided eggs of *T. muris*  
94 Edinburgh (E) isolate for use in all infection studies. Egg infectivity and maintenance of  
95 parasite stocks were carried as described by Wakelin, 1967 [8]. Experimental mice were  
96 infected with 200 embryonated eggs in 200 µl of ultra-pure distilled water via oral gavage.  
97 Worm burden was assessed at day 21 PI. Caecum and proximal colon were harvested at  
98 autopsy to determine parasite clearance of each mouse at the end of each experiment as  
99 described by Else *et al.*, 1990 [9].

### 100 **Human samples**

101 Prior to the commencement of the clinical study, NHS ethics approval was obtained from  
102 Berkshire B Research Ethics Committee (REC reference number: 14/SC/1413; IRAS reference  
103 number: 157778) in order to screen clinical IBD samples of faeces and serum. Participants  
104 were recruited from the Salford Royal NHS Foundation Trust. Normal healthy volunteers  
105 were recruited in accordance with the University ethics committee and the Human Tissue

106 Act 2004. Faecal samples were taken from healthy controls (n=10) with no prior history of  
107 IBD or gut problems, or patients (n=31) with suspected IBD or clinically confirmed IBD. All  
108 patient samples were taken via outpatient clinics, returned by patients as part of standard  
109 clinical practice to be assessed for Faecal Calprotectin (FCP). Colonoscopy/biopsy were  
110 undertaken in those with elevated FCP. Of the patients, 6 patients had IBD excluded, mainly  
111 leading to a clinical diagnosis of irritable bowel syndrome (IBS), 19 known IBD patients were  
112 in remission at the of time testing (10 ulcerative colitis and 9 Crohn's disease) and 6 patients  
113 had active IBD (n=5 CD, n=1 UC) at the time of testing.

#### 114 **Statistics and analysis**

115 Where statistics are quoted, experimental groups were compared using linear regression,  
116 Mann-Whitney U test or two-way analysis of variance (ANOVA) test followed by Sidak's post  
117 hoc multiple comparisons test, where appropriate. P values <0.05 were considered  
118 significant. Data are presented as mean  $\pm$  SEM unless otherwise stated. Statistical analyses  
119 were carried out using GraphPad Prism 7 (GraphPad Software, La Jolla, California, USA;  
120 [www.graphpad.com](http://www.graphpad.com)).

121 **Results**

122 **Early immune response informs resistance to *T. muris*-induced colitis**

123 Following challenge with *Trichuris muris*, as expected BALB/c mice expelled most or all of  
124 the worms by 21 days PI, whereas AKR mice were unable to expel all worms and remained  
125 infected with a significantly higher worm burden ( $P=0.016$ , Mann-Whitney U test) (Figure  
126 1A). Colitis scoring revealed increased histological changes associated with inflammation in  
127 both AKR and BALB/c mice after infection (Figure 1B). These changes included influx of  
128 immune cells, presence of immune cells in the submucosa, crypt hyperplasia and goblet cell  
129 loss. In agreement with previous data, the colitis scores in BALB/c mice peaked at 21 days PI  
130 and had begun to return to normal by 31 days PI. As expected, colitis scores in AKR mice  
131 rose after infection and peaked at 31 days PI where the colitis score was significantly greater  
132 than that of the BALB/c mice ( $P=0.046$ , ANOVA; Figure 1B). Representative images of  
133 haematoxylin and eosin stained proximal colon sections in naïve mice and at 31 days PI are  
134 shown in Figure 1C. Collectively, these results reproduce previously published research in  
135 the AKR/BALB/c infection model [4], where BALB/c mice initiate an acute, resolving  
136 inflammation after *T. muris* challenge and AKR mice show delayed immune response that  
137 results in a chronic inflammatory phenotype due to a failure to expel worms.

138 We investigated immune cell recruitment to the colonic lamina propria by flow cytometry at  
139 1, 7, 14, 21 and 31 days PI. BALB/c mice had an acute resolving response whereas AKR mice  
140 developed a chronic inflammatory response. At 24 hours PI BALB/c mice responded rapidly  
141 to *T. muris* challenge, with an early increase in the proportions of DCs, macrophages and  
142 neutrophils ( $P<0.05$ , ANOVA) in colonic lamina propria tissues and mesenteric lymph nodes  
143 compared to naïve mice (Figure 1D and 1E, Supplementary data). BALB/c and AKR had  
144 different responses to infection, with BALB/c tending to have greater recruitment of innate

145 immune cells at D1 compared with susceptible AKR mice. This trend for a greater early  
146 magnitude of response in the BALB/c compared with AKR was also seen at D7, D14 and D21  
147 post-infection with the greatest differences between the immune response of BALB/c mice  
148 to AKR at D14 PI (Figure 1B, Supplementary data). However, by D31, proportions of  
149 macrophages ( $P<0.001$ ), inflammatory monocytes ( $P<0.01$ ) and neutrophils ( $P<0.001$ ), were  
150 all significantly greater in AKR mice, whereas the proportions of these cell types returned  
151 near to baseline levels in BALB/c mice (Figure 1D-G). The increase in immune cells observed  
152 in AKR mice at D31 corresponded with the peak colitis score, and likewise the reduction in  
153 immune cells in BALB/c mice at D31 was paralleled with a reduction in colitis score (Figure  
154 1B). Collectively this work indicated an altered dynamic of immune response in resistant  
155 versus susceptible mice, therefore we explored the early transcriptome in order to  
156 understand changes present between colitis-susceptible and colitis-resistant mice.

#### 157 **Transcriptional changes induced by *T. muris* infection identified at 24 hours post infection**

158 Transcriptional changes in the proximal colon (the principal site of *T. muris* infection) were  
159 investigated at 24 hours post-infection via microarray, prior to the establishment of overt  
160 signs of inflammation. Genes with the largest differential expression at 24 hours post were  
161 calculated (Figure 2A). Of the 77 probe sets that were significantly upregulated in AKR mice  
162 and downregulated in BALB/c mice (1-IPPLR  $<0.05$ ), 65 were successfully matched to gene  
163 IDs in DAVID. The gene upregulated in colitis-susceptible AKR mice with the largest  
164 differential expression compared to BALB/c mice was the receptor for advanced glycation  
165 end-products (*Rage*) (Log<sub>2</sub> fold change = 2.0718; 1-IPPLR = 0.003) (Figure 2B; Supplementary  
166 data). Upregulation of *Rage* in susceptible mice was confirmed by qPCR of proximal colon at  
167 24 hours PI in an independent experiment ( $P<0.001$ , Mann-Whitney U test, Figure 2C).



168 Differential expression of transcription factors was analysed using TIGERi for MATLAB [10].  
169 The most notable change in transcription factor gene expression was the downregulation of  
170 *FoxO4* (Forkhead box O4) following *T. muris* infection in AKR mice (Supplementary data).  
171 FOXO4 occurs downstream of the RAGE activation signalling cascade and serves to inhibit  
172 DNA binding and transcriptional activity of NF- $\kappa$ B (nuclear factor kappa-B), preventing  
173 inflammation [11]. *FoxO4* is also downregulated in the colonic epithelial cells of IBD patients  
174 [11]. The upregulation of proinflammatory *Rage* and downregulation of anti-inflammatory  
175 *FoxO4* from the RAGE signalling pathway provide compelling evidence for the relevance of  
176 RAGE activation in colitis susceptibility in AKR mice during *T. muris* infection.

#### 177 **Identifying the cellular source of RAGE**

178 Over 90% of CD326<sup>+</sup> (EpCAM) epithelial cells expressed RAGE (Figure 3A) and they fell into  
179 two distinct groups, expressing either low (RAGE<sup>lo</sup>) or high (RAGE<sup>hi</sup>) levels of RAGE. In naïve  
180 mice, the total proportion of CD326<sup>+</sup> epithelial cells that expressed RAGE was significantly  
181 higher in colitis-susceptible AKR mice (P<0.01, ANOVA). The proportion of RAGE<sup>lo</sup> to RAGE<sup>hi</sup>  
182 cells was similar in both naïve AKR and BALB/c mice, but there was significant drop in the  
183 proportion of RAGE<sup>hi</sup> epithelial cells observed 2 and 7 days PI (P<0.0001, ANOVA), in both  
184 AKR and BALB/c mice (Figure 3B).

185 Immunohistochemistry was used to confirm expression of RAGE in tissue (Figure 3C). Akin to  
186 the flow cytometry data, we saw high expression of RAGE throughout the colonic  
187 epithelium. Concurring with the flow cytometry data, there was only minimal fluorescence  
188 seen in the immune lamina propria cells indicating that epithelial cells indeed express  
189 greater amounts of membrane-bound RAGE than immune cells. This data suggest that the  
190 epithelial cells are likely to be the source of the observed increase in *Rage* mRNA. There was  
191 a reduction in intensity of RAGE staining at 7 days PI by immunohistochemistry (Figure 3C)

192 compared to naïve mice, which also correlated with the measured shift in proportions of  
193 epithelial cells from RAGE<sup>hi</sup> to RAGE<sup>lo</sup> cells measured by flow cytometry.

#### 194 **Is RAGE differentially cleaved in colitis-susceptible and colitis-resistant mice?**

195 RAGE may be internalised after ligand binding, or released as soluble RAGE (sRAGE) via  
196 enzymatic cleavage by ADAM10 or MMP9 [12, 13]. To investigate whether RAGE was being  
197 cleaved we assessed sRAGE levels in serum and the faeces by ELISA. Serum sRAGE levels in  
198 susceptible mice remained constant throughout the experiment. Resistant mice had  
199 significantly higher serum sRAGE than susceptible mice both prior to infection and at 24  
200 hours PI ( $P<0.001$ , ANOVA; Figure 3D). sRAGE was also detectable in faeces, where both  
201 resistant and susceptible mice had very low levels of sRAGE prior to infection. Over the  
202 course of infection, faecal sRAGE in BALB/c mice increased to significantly higher levels than  
203 susceptible mice at 24 hours and 21 days PI ( $P<0.01$ , ANOVA; Figure 3E). Faecal sRAGE was  
204 not detected at all up to D21 in susceptible mice.

205 Correlation of serum and faecal sRAGE levels to colitis scores highlights the changing levels  
206 of sRAGE in BALB/c mice during the course of *T. muris* infection relative to pathological  
207 changes in the colon (Figure 3F-G). The increased circulating serum sRAGE at D0 in BALB/c  
208 mice, where colitis scores are lowest, drops as colitis increases at D1 and D21 ( $R^2=0.90$ ).  
209 Faecal sRAGE in the BALB/c mice increases relative to colitis scores ( $R^2=0.99$ ). However,  
210 sRAGE levels in susceptible mice did not change during the course of infection relative to  
211 increasing colitis scores from D0 to D21 post-infection (serum  $R^2=0.99$ , faecal  $R^2=0.73$ ).

212 We then investigated levels of the RAGE ligand S100A8 (one part of the heterodimeric  
213 calprotectin protein, currently used as a clinical biomarker for IBD) in serum and faeces as  
214 an indicator of whether sRAGE might be quenching the proinflammatory effects of  
215 circulating RAGE ligands by acting as a decoy receptor. Serum and faecal S100A8 did

216 increase slightly during the course of infection in both AKR and BALB/c mice, but no  
217 statistical differences were observed between the two strains and there was high variability  
218 between mice. At 21 days PI BALB/c mice had greater levels of serum S100A8 than AKR mice  
219 (not significant, ANOVA; Supplementary data). Faecal S100A8 remained broadly similar in  
220 naïve and *T. muris* infected mice of both AKR and BALB/c strains. As with serum S100A8,  
221 faecal S100A8 was slightly raised in BALB/c mice at 21 days PI compared to AKR mice but  
222 this was not significant (ANOVA; (Supplementary data)). In addition to being highly variable,  
223 S100A8 correlated poorly with colitis scores (Supplementary data).

#### 224 **sRAGE is differentially expressed in IBD**

225 As the differences in sRAGE were most apparent and consistent in faeces we focused on  
226 analysis of faecal specimens from healthy volunteers and patients with IBD or suspected  
227 IBD. sRAGE was not detected in the faecal samples of healthy volunteers. In contrast, s-  
228 RAGE was detectable in the patient cohort (Figure 4A). The highest levels of sRAGE were  
229 seen in patients with IBD excluded (largely IBS ascribed) and IBD in remission, although  
230 remission patients were more variable. Patients with active IBD characterised by severe  
231 inflammation had low levels of sRAGE and increased calprotectin.

232 We then transformed the faecal RAGE and calprotectin ELISA data into present (1) or absent  
233 (0), where protein is scored as present if  $\geq 3*SD$  above baseline. When patient data was  
234 stratified into groups (active IBD, IBD in remission, IBD excluded (IBS) and healthy controls)  
235 the ratio of RAGE to calprotectin clearly identified healthy controls (0, 0) and active IBD (0,  
236 1) from IBS and IBD in remission (Figure 4B). In healthy individuals, we saw no sRAGE or  
237 calprotectin signal in any subject. In active IBD we had a consistent pattern of Calprotectin  
238 present, but no sRAGE. For patients whose disease is resolving we saw a more complicated

239 picture, where we had a subset of patients undergoing routine test that were expressing  
240 both sRAGE and Calprotectin.

## 241 Discussion

242 Animal models are crucial for examining the causative events that lead to diseases such as  
243 chronic colitis. Genetic factors influence the likelihood of developing colitis, but it is  
244 impossible to continually monitor individuals with potential genetically susceptibility in  
245 order to identify the pathways that drive the development of chronic intestinal  
246 inflammation. Models that accurately simulate preclinical changes in the gut allow us to  
247 interrogate the pathways leading to chronic colitis, prior to the development of the complex  
248 inflammatory environment when disease is established. Levison *et al.* [14] have previously  
249 shown that *T. muris* infection in AKR mice causes colitis that correlates phenotypically and  
250 transcriptionally with the profile of human CD. Here, we provide novel evidence reinforcing  
251 the use of the *T. muris* infection as a model for the discovery of preclinical intestinal  
252 inflammation markers that translate into human IBD patients.

253 In line with previous *T. muris* infection studies, we observed altered dynamics of the  
254 immune response between colitis resistant versus susceptible mice, characterised by an  
255 early influx of DCs [5]. We then identified upregulation of *Rage* as a potential indicator of  
256 colitis susceptibility in mice. RAGE activity has already been linked to active IBD [15] as well  
257 as other inflammatory diseases including diabetes, Alzheimer's, airway inflammation, cancer  
258 and haemorrhagic shock [16]. Additionally, several RAGE ligands have been identified as  
259 associated with the inflammation in IBD, including calprotectin, EN-RAGE and HMGB1 [17-  
260 19]. Thus, our data from the mouse model shows a clear link to known pathology in IBD. It is  
261 important to validate results from mouse model to human disease and therefore we  
262 conducted a small validation study to assess faecal sRAGE. Faecal sRAGE was readily  
263 detected in patient's faecal samples. Akin to the mouse data we saw lower sRAGE in  
264 patients with active chronic inflammation. Surprisingly, symptomatic patients with IBD

265 excluded on a basis of normal FCP and/or colonoscopy had higher levels of sRAGE than  
266 healthy volunteers. Largely, IBS was clinically ascribed but that was not based on formal  
267 diagnostic criteria, and other diagnoses such as bile acid diarrhoea or microscopic colitis  
268 were not formally excluded. The sample size was small and more prospective studies are  
269 needed to confirm this preliminary observation. Patients whose IBD was reported to be in  
270 remission had variable levels of sRAGE. It is tempting to speculate that lower levels of sRAGE  
271 are associated with a risk of subsequent flare of inflammation but as we only had single  
272 samples from the patients, we cannot assess this, however it would be interesting to track  
273 sRAGE over time in a prospective study of patients with IBD.

274 RAGE has been described on several immune cells with, for example, neutrophils identified  
275 as expressing large amounts of RAGE [20]. Our flow cytometry and immunohistochemistry  
276 analysis of RAGE expression in multiple cell types present in and around the lamina propria  
277 and crypts of the colon, however, did not suggest that immune cells were the main sources  
278 of cellular RAGE. Our data in fact showed that a major cellular source of RAGE in the gut  
279 were the gut epithelial cells. Previous studies have shown that epithelial cells not only  
280 express RAGE, but also upregulate RAGE expression during colonic inflammation [15].  
281 Changes we observed in the levels of RAGE expression suggest that it is the epithelial cell  
282 response to *T. muris* infection that informs subsequent susceptibility to chronic  
283 inflammation. The reduction in the amount of RAGE present at the cell membrane we saw  
284 by flow cytometry and by immunohistochemistry immediately following *T. muris* infection  
285 could be caused by either internalisation of activated RAGE-ligand complexes or ADAM10-  
286 mediated shedding to produce sRAGE [21, 22]. Splice variants of *Rage* may also result in a  
287 truncated RAGE molecule or a modified and actively secreted decoy receptor [23, 24]. The  
288 process by which epithelial cells may undergo RAGE shedding represents an important

289 distinction in the course of gut immunity and homeostasis, and may be an essential  
290 component in dictating whether inflammation becomes chronic or resolves. Further  
291 investigation into the extent to which splice variants, internalisation or sheddase activity  
292 form the mechanism for changes in sRAGE in both the *Trichuris* model and in human  
293 patients could provide further insight for the role of the RAGE pathway in colitis.

294 Activation of RAGE can have several outcomes including immune cell migration and  
295 transcription of pro-inflammatory cytokines. RAGE-mediated leukocyte migration via CD11b  
296 (Mac-1) is involved in migration of immune cells to the site of injury and homing of DCs to  
297 the lymph nodes [15, 25]. However, whether the upregulation of *Rage* is crucial to facilitate  
298 the early DC migration in the *T. muris* model remains unclear. While we observed  
299 differences in DC migration as early as day 1 PI, we saw no differences between cell surface  
300 RAGE expression between AKR and BALB/c mice that might account for the altered  
301 dynamics of DC recruitment. Similarly, RAGE has been linked to neutrophil recruitment but  
302 we only observed modest neutrophil infiltration in the first 24 hours PI and no difference  
303 between colitis-susceptible or colitis-resistant mice. Despite minimal differences in immune  
304 cell presence during the early stages of *T. muris* infection, prolonged activation of RAGE  
305 results in activation of inflammatory signalling molecules including NF- $\kappa$ B and MAP kinases  
306 [16]. Consequently, an environment where RAGE ligands such as HMGB1, and S100 proteins  
307 are continually present results in perpetual NF- $\kappa$ B activation and subsequent chronic  
308 inflammatory conditions.

309 We observed striking differences in the levels of faecal and systemic sRAGE between colitis-  
310 resistant and susceptible mice, with BALB/c mice rapidly producing sRAGE in response to *T.*  
311 *muris* infection. sRAGE effectively acts as a decoy receptor for RAGE as it can still bind to the  
312 same damage induced ligands as membrane bound RAGE but, as it lacks a cytoplasmic tail, it

313 cannot initiate the pro-inflammatory signalling cascade [26]. Thus, higher levels of sRAGE  
314 might be expected to block inflammation and indeed reduced levels of sRAGE have been  
315 found in mice with chronic inflammation as well as patients suffering from chronic  
316 inflammatory diseases [27]. The reduction in epithelial RAGE expression followed by  
317 increases in circulating sRAGE in colitis-resistant mice suggests shedding of RAGE to form  
318 sRAGE as a protective feedback process against the development of chronic inflammation.  
319 Colitis-susceptible AKR mice show the same reduction in epithelial RAGE expression but did  
320 not produce sRAGE in the same quantities, suggesting internalisation and activation of RAGE  
321 and initiation of subsequent proinflammatory pathways after *T. muris* infection. Indeed, it is  
322 known that *T. muris* excretory/secretory (E/S) products induce NF- $\kappa$ B signalling in colonic  
323 epithelial cells shortly after infection and the susceptible immune response to *T. muris* is  
324 associated with expression of the T helper (T<sub>H</sub>) 1 cytokines interferon (IFN)- $\gamma$ , tumour  
325 necrosis factor (TNF)- $\alpha$  and IL-12 [28]. This response parallels the cytokines expressed after  
326 RAGE activation, which include T<sub>H</sub>1 and T<sub>H</sub>17 cytokines TNF- $\alpha$ , IL-1 $\alpha$ , IL-6, IL-8 and IL-12 [16].  
327 Diagnosis of IBD usually involves an assessment of clinical history and physical examination,  
328 with endoscopy and histology considered to be the gold standard tools [29]. Accurately  
329 assessing disease activity remains dependent on colonoscopy and/or small bowel imaging.  
330 The invasiveness of current diagnostic methods is not ideal and recent work has aimed to  
331 identify serum or faecal biomarkers that can reliably identify active disease [30]. The  
332 number of potential IBD biomarkers is high, but there remains a lack of reliable and  
333 reproducible biomarkers for use in clinical practice [31]. Efficacy of current therapies is also  
334 variable, with risks of sometimes serious side effects, especially infection meaning there is  
335 considerable interest for new biomarkers and new therapeutics [32]. Calprotectin entered  
336 clinical practice as an IBD biomarker to aid clinical diagnosis non-invasively, but



337 measurements of faecal calprotectin are variable and there is little agreement about what  
338 should be considered a normal baseline level in healthy patients [33]. Indeed, the concept of  
339 a simple normal cut off is impossible to entertain given the enormous heterogeneity in  
340 faecal water content, matrix composition, transit time, site and extent of inflammation and  
341 the contact of faecal component sampled with the mucosa; composite measures are  
342 essential. Calprotectin is a product of tissue damage and binds to RAGE to promote  
343 inflammation, but this action will be reduced in the presence of the decoy receptor sRAGE.  
344 Our preliminary observation of alterations in sRAGE expression in mouse and human disease  
345 suggests there may be merit in looking at both calprotectin and sRAGE to better predict  
346 whether calprotectin and other RAGE ligands are indeed able to drive pro-inflammatory  
347 signals. This may improve the reliability of calprotectin as a biomarker.  
348 Our pilot clinical study successfully validated the use of the *T. muris* infection model as  
349 highly translatable to human IBD states. The *T. muris* model is a useful tool in dissecting  
350 early pathways that are involved in the onset of colitis. By using a mouse model and  
351 focusing on early initiating events in the development of colitis, we have identified a  
352 potential role for RAGE in mediating the development of inflammation. Furthermore, our  
353 observation of high levels of sRAGE in acute resolving inflammation suggested there may be  
354 utility in monitoring of sRAGE to monitor IBD. However, a larger clinical study would be  
355 required to investigate this further.

### 356 **Acknowledgements**

357 Funding for this research was provided by the EPSRC, Epistem Ltd. and the BBSRC impact  
358 accelerator fund. NHS Salford Trust provided the human clinical samples for this project,  
359 and we are grateful to all clinical staff, patients and healthy volunteers who took part in the  
360 trial.

361 The Bioimaging Facility microscopes used in this study were purchased with grants from  
362 BBSRC, Wellcome and the University of Manchester Strategic Fund. Special thanks go to  
363 Roger Meadows from the Bioimaging Facility for his help with the microscopy and image  
364 acquisition.

## 365 References

- 366 1. Baumgart, D.C. and S.R. Carding, *Inflammatory bowel disease: cause and*  
367 *immunobiology*. Lancet, 2007. **369**(9573): p. 1627-40.
- 368 2. Kaplan, G.G., *The global burden of IBD: from 2015 to 2025*. Nat Rev Gastroenterol  
369 Hepatol, 2015. **12**(12): p. 720-7.
- 370 3. Liverani, E., et al., *How to predict clinical relapse in inflammatory bowel disease*  
371 *patients*. World J Gastroenterol, 2016. **22**(3): p. 1017-33.
- 372 4. Levison, S.E., et al., *Genetic analysis of the Trichuris muris-induced model of colitis*  
373 *reveals QTL overlap and a novel gene cluster for establishing colonic inflammation*.  
374 BMC Genomics, 2013. **14**: p. 127.
- 375 5. Cruickshank, S.M., et al., *Rapid dendritic cell mobilization to the large intestinal*  
376 *epithelium is associated with resistance to Trichuris muris infection*. Journal of  
377 Immunology, 2009. **182**(5): p. 3055-62.
- 378 6. Bowcutt, R., et al., *A role for the pattern recognition receptor Nod2 in promoting*  
379 *recruitment of CD103+ dendritic cells to the colon in response to Trichuris muris*  
380 *infection*. Mucosal Immunol, 2014. **7**(5): p. 1094-105.
- 381 7. Foell, D., H. Wittkowski, and J. Roth, *Monitoring disease activity by stool analyses:*  
382 *from occult blood to molecular markers of intestinal inflammation and damage*. Gut,  
383 2009. **58**(6): p. 859-68.
- 384 8. Wakelin, D., *Acquired immunity to Trichuris muris in the albino laboratory mouse*.  
385 Parasitology, 1967. **57**(3): p. 515-24.
- 386 9. Else, K.J., et al., *The influence of genes mapping within the major histocompatibility*  
387 *complex on resistance to Trichuris muris infections in mice*. Parasitology, 1990. **101 Pt**  
388 **1**: p. 61-7.
- 389 10. Han, N., H.A. Noyes, and A. Brass, *TIGERi: modeling and visualizing the responses to*  
390 *perturbation of a transcription factor network*. BMC Bioinformatics, 2017. **18**(Suppl  
391 7): p. 260.
- 392 11. Zhou, W., et al., *FoxO4 inhibits NF-kappaB and protects mice against colonic injury*  
393 *and inflammation*. Gastroenterology, 2009. **137**(4): p. 1403-14.
- 394 12. Curran, C.S. and P.J. Bertics, *Human eosinophils express RAGE, produce RAGE ligands,*  
395 *exhibit PKC-delta phosphorylation and enhanced viability in response to the RAGE*  
396 *ligand, S100B*. Int Immunol, 2011. **23**(12): p. 713-28.
- 397 13. Zhang, L., et al., *Receptor for advanced glycation end products is subjected to protein*  
398 *ectodomain shedding by metalloproteinases*. J Biol Chem, 2008. **283**(51): p. 35507-  
399 16.
- 400 14. Levison, S.E., et al., *Colonic transcriptional profiling in resistance and susceptibility to*  
401 *trichuriasis: phenotyping a chronic colitis and lessons for iatrogenic helminthosis*.  
402 Inflamm Bowel Dis, 2010. **16**(12): p.:2065-79.
- 403 15. Body-Malapel, M., et al., *The RAGE signaling pathway is involved in intestinal*  
404 *inflammation and represents a promising therapeutic target for Inflammatory Bowel*  
405 *Diseases*. Mucosal Immunol, 2019. **12**(2): p. 468-478.
- 406 16. Sparvero, L.J., et al., *RAGE (receptor for advanced glycation endproducts), RAGE*  
407 *ligands, and their role in cancer and inflammation*. Journal of Translational Medicine,  
408 2009. **7**.

- 409 17. Whitehead, S.J., et al., *Effect of faecal calprotectin assay variability on the*  
410 *management of inflammatory bowel disease and potential role of faecal S100A12.* J  
411 Clin Pathol, 2017. **70**(12): p. 1049-1056.
- 412 18. Chen, X., et al., *HMGB1 exacerbates experimental mouse colitis by enhancing innate*  
413 *lymphoid cells 3 inflammatory responses via promoted IL-23 production.* Innate  
414 Immun, 2016. **22**(8): p. 696-705.
- 415 19. Aranda, C.J., et al., *Calprotectin protects against experimental colonic inflammation*  
416 *in mice.* Br J Pharmacol, 2018. **175**(19): p. 3797-3812.
- 417 20. Huebener, P., et al., *The HMGB1/RAGE axis triggers neutrophil-mediated injury*  
418 *amplification following necrosis.* J Clin Invest, 2019. **130**: p. 1802.
- 419 21. Sevillano, N., et al., *Internalization of the receptor for advanced glycation end*  
420 *products (RAGE) is required to mediate intracellular responses.* J Biochem, 2009.  
421 **145**(1): p. 21-30.
- 422 22. Yang, W.S., et al., *Ectodomain Shedding of RAGE and TLR4 as a Negative Feedback*  
423 *Regulation in High-Mobility Group Box 1-Activated Aortic Endothelial Cells.* Cell  
424 Physiol Biochem, 2018. **51**(4): p. 1632-1644.
- 425 23. Hudson, B.I., et al., *Identification, classification, and expression of RAGE gene splice*  
426 *variants.* FASEB J, 2008. **22**(5): p. 1572-80.
- 427 24. Jules, J., D. Maignel, and B.I. Hudson, *Alternative splicing of the RAGE cytoplasmic*  
428 *domain regulates cell signaling and function.* PLoS One, 2013. **8**(11): p. e78267.
- 429 25. Manfredi, A.A., et al., *Maturing dendritic cells depend on RAGE for in vivo homing to*  
430 *lymph nodes.* J Immunol, 2008. **180**(4): p. 2270-5.
- 431 26. Basta, G., et al., *Circulating soluble receptor for advanced glycation end products is*  
432 *inversely associated with glycemic control and S100A12 protein.* J Clin Endocrinol  
433 Metab, 2006. **91**(11): p. 4628-34.
- 434 27. Maillard-Lefebvre, H., et al., *Soluble receptor for advanced glycation end products: a*  
435 *new biomarker in diagnosis and prognosis of chronic inflammatory diseases.*  
436 Rheumatology, 2009. **48**(10): p. 1190-1196.
- 437 28. deSchoolmeester, M.L., H. Manku, and K.J. Else, *The innate immune responses of*  
438 *colonic epithelial cells to Trichuris muris are similar in mouse strains that develop a*  
439 *type 1 or type 2 adaptive immune response.* Infect Immun, 2006. **74**(11): p. 6280-6.
- 440 29. Halfvarson, J., *Genetic epidemiology of inflammatory bowel disease, early twin and*  
441 *family studies,* in *Molecular genetics of inflammatory bowel disease,* M. D'amato and  
442 J.D. Rioux, Editors. 2013, Springer: New York. p. 23-43.
- 443 30. Lehmann, F.S., E. Burri, and C. Beglinger, *The role and utility of faecal markers in*  
444 *inflammatory bowel disease.* Therap Adv Gastroenterol, 2015. **8**(1): p. 23-36.
- 445 31. Stevens, T.W., et al., *Systematic review: predictive biomarkers of therapeutic*  
446 *response in inflammatory bowel disease-personalised medicine in its infancy.* Aliment  
447 Pharmacol Ther, 2018. **48**(11-12): p. 1213-1231.
- 448 32. Nanau, R.M., L.E. Cohen, and M.G. Neuman, *Risk of infections of biological therapies*  
449 *with accent on inflammatory bowel disease.* J Pharm Pharm Sci, 2014. **17**(4): p. 485-  
450 531.
- 451 33. Dhaliwal, A., et al., *Utility of faecal calprotectin in inflammatory bowel disease (IBD):*  
452 *what cut-offs should we apply?* Frontline Gastroenterol, 2015. **6**(1): p. 14-19.

453 **Figure legends**

454 **Figure 1: Colitis-susceptible AKR mice show delayed expulsion of *Trichuris muris* worms at**  
455 **21 days and increased evidence of colitis at 31 days post infection.** (A) Mean worm burden  
456 ( $\pm$ SD) at 21 days post infection (PI). (B) Cumulative colitis score (0-20) based on the grading  
457 of histological changes including crypt elongation (score 0-4), depletion of goblet cells (score  
458 0-4), thickness of muscle wall (score 0-4), inflammatory cell infiltration (score 0-4) and  
459 destruction of architecture (score 0 or 3-4). (C) Representative images of haematoxylin and  
460 eosin stained proximal colon sections from naïve mice and at 31 days PI; note the high levels  
461 of immune cell infiltration and loss of goblet cells in the colonic tissues of AKR mice at 31  
462 days post-infection. Bar=50 $\mu$ m. n=3-5 mice per time point. Analysis by Mann-Whitney U test  
463 or two-way ANOVA followed by Sidak's multiple comparisons test where appropriate. (D-G)  
464 Dendritic cell (CD45<sup>+</sup> MHCII<sup>+</sup> CD11c<sup>+</sup> F4/80<sup>-</sup> CD103<sup>+/-</sup> CD11b<sup>+/-</sup>), macrophage (CD45<sup>+</sup> MHCII<sup>+</sup>  
465 F4/80<sup>+</sup> CD11c<sup>+/-</sup>), inflammatory monocyte (CD45<sup>+</sup> Ly6G<sup>+</sup> CD11b<sup>+</sup> CD115<sup>+</sup>) and neutrophil  
466 (CD45<sup>+</sup> Ly6G<sup>+</sup> CD11b<sup>+</sup> CD115<sup>-</sup>) populations as proportion of CD45<sup>+</sup> cells ( $\pm$ SEM) in naïve mice  
467 and during *T. muris* challenge. n=3 mice per time point. Analysis by two-way ANOVA with  
468 Sidak's multiple comparisons post hoc test. \*\*\*P<0.001, \*\*P<0.01, \*P<0.05.

469

470 **Figure 2: Gene expression changes in proximal colon 24 hours post-infection with *Trichuris***  
471 ***muris*.** (A) Genes most significantly upregulated in AKR mice and downregulated in BALB/c  
472 mice (red) or downregulated in AKR mice and upregulated in BALB/c mice (blue) following  
473 24 hour *Trichuris muris* infection. (B) Schematic of the structure of RAGE, showing activating  
474 ligands, downstream NF- $\kappa$ B activation and formation of soluble RAGE (sRAGE) by ADAM10  
475 or MMP9 cleavage. (C) mRNA expression of *RAGE* in the proximal colon at D1 post-infection  
476 as measured by qPCR. Data generated using Affymetrix Mouse 430 2.0 microarrays analysed

477 using the puma and TIGERi (TFA illustrator for global explanation of regulatory interactions)  
478 packages for Bioconductor. n=4-5 mice per group. Analysis by Mann-Whitney U-test.  
479 \*\*P<0.01.

480

481 **Figure 3: Receptor for advanced glycation end-products (RAGE) expression in the colon of**  
482 ***Trichuris muris* infected AKR and BALB/c mice (aged 6-8 weeks).** (A) Proportion of RAGE  
483 expressing epithelial cells (CD326<sup>+</sup>,  $\pm$ SEM) during early *Trichuris muris* infection. (B)  
484 Proportion of colonic epithelial cells expressing high levels of RAGE is reduced shortly after  
485 infection, as measured by flow cytometry. (C) Representative images of colon sections  
486 stained for RAGE (FITC; green) and nuclei (DAPI; blue) in naïve mice and at 7 days post-  
487 infection (Bar = 100 $\mu$ m; inset bar = 22 $\mu$ m). (D-E) sRAGE present in serum or faeces during  
488 *Trichuris muris* infection as measured by ELISA. (F-G) Correlation of serum and faecal sRAGE  
489 versus colitis score at 0, 1 and 21 days post-infection. n=3-5 mice per time point. Analysis by  
490 linear regression, two-way ANOVA with Sidak's post hoc test. \*\*P<0.01 \*\*\*\*P<0.001.

491

492 **Figure 4: Soluble receptor for advanced glycation end-products (sRAGE) is detectable in**  
493 **the faeces and serum of IBD patients.** (A) Scatter plot of sRAGE (pg/ml) versus calprotectin  
494 ( $\mu$ g/ml) present in the faeces of patients with active IBD, IBD in remission, IBD excluded (IBS)  
495 compared to healthy controls. (B) Relative levels of faecal sRAGE versus calprotectin in  
496 human IBD/IBS or healthy controls. Data were transformed to arbitrary units (AU) where  
497 samples greater than 3SD from baseline = 1 (present), otherwise they scored 0 (absent).

**Figure 1**

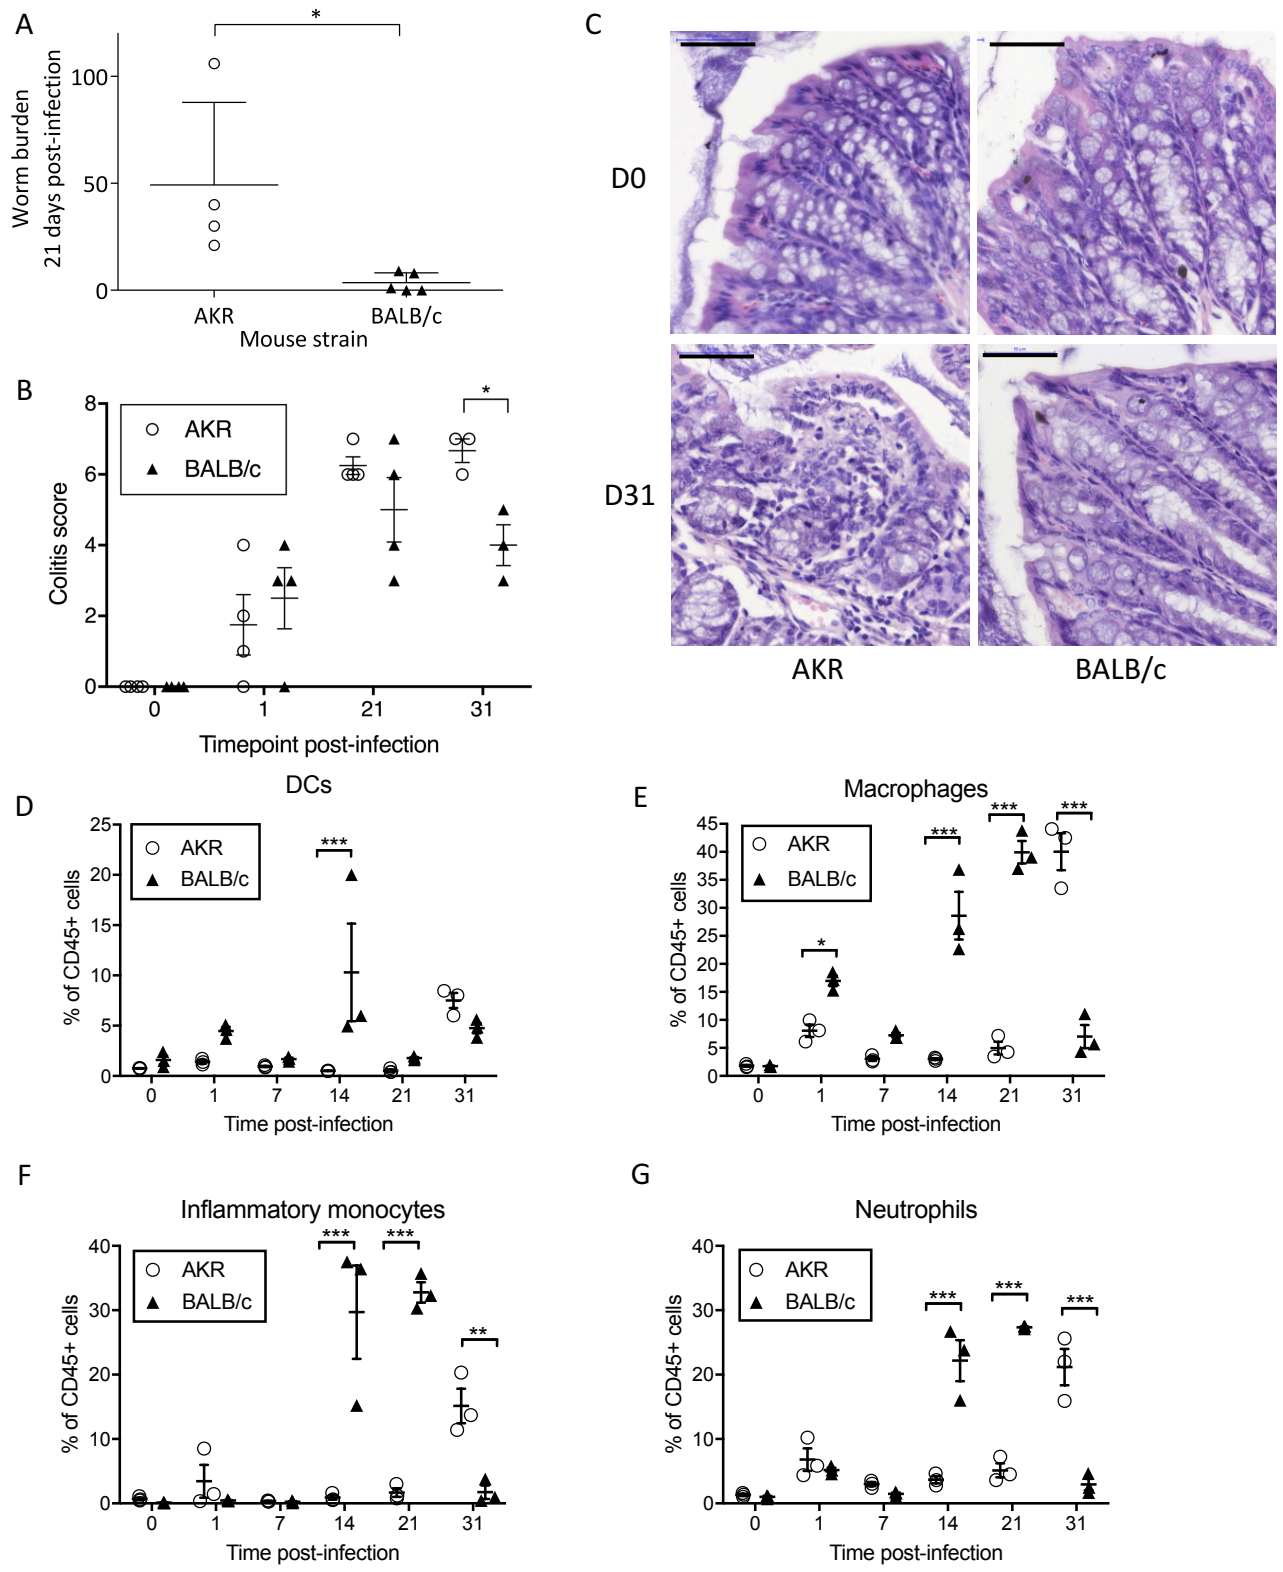

Figure 2

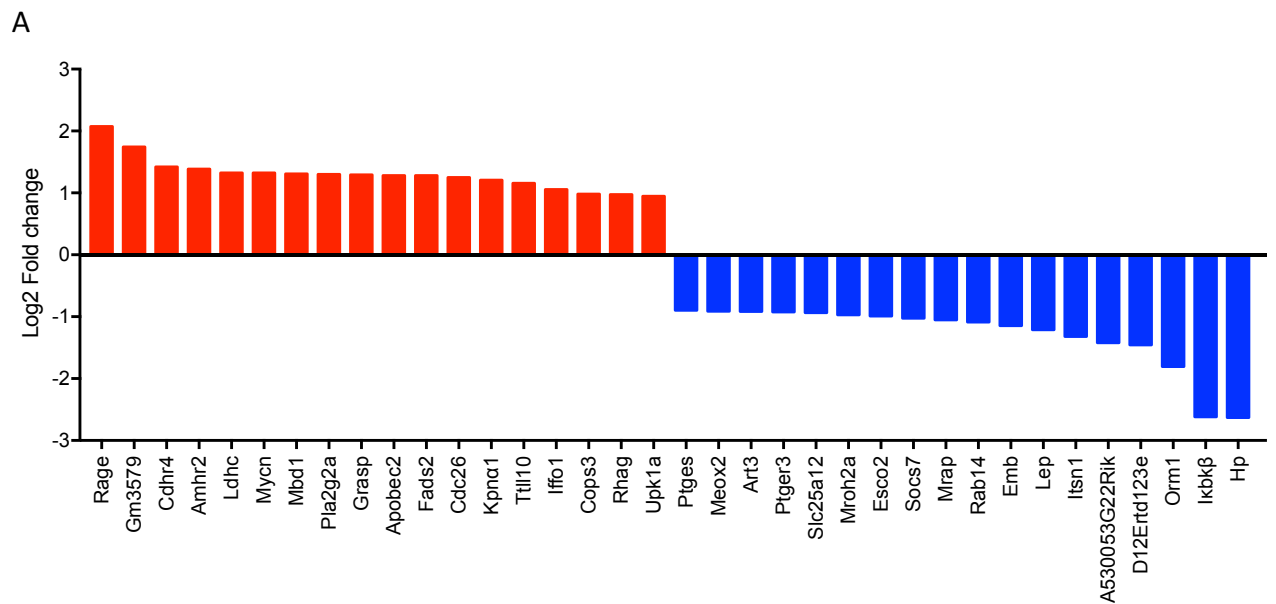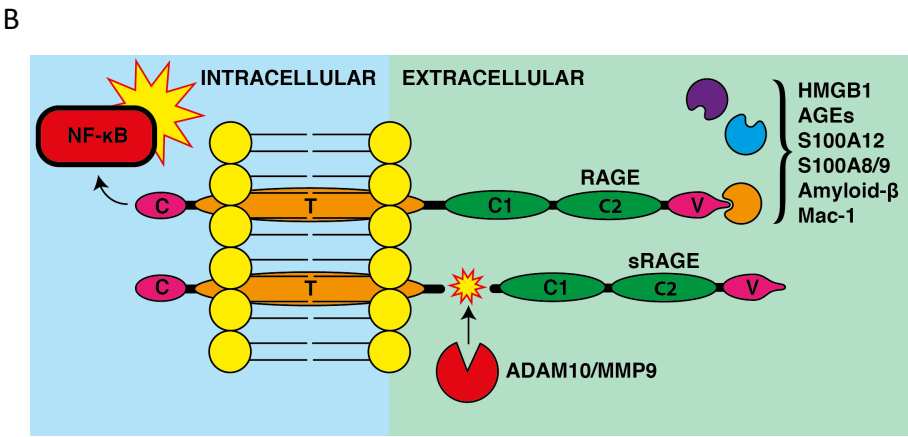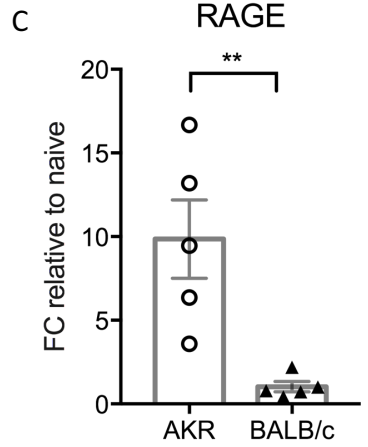



**Figure 3**

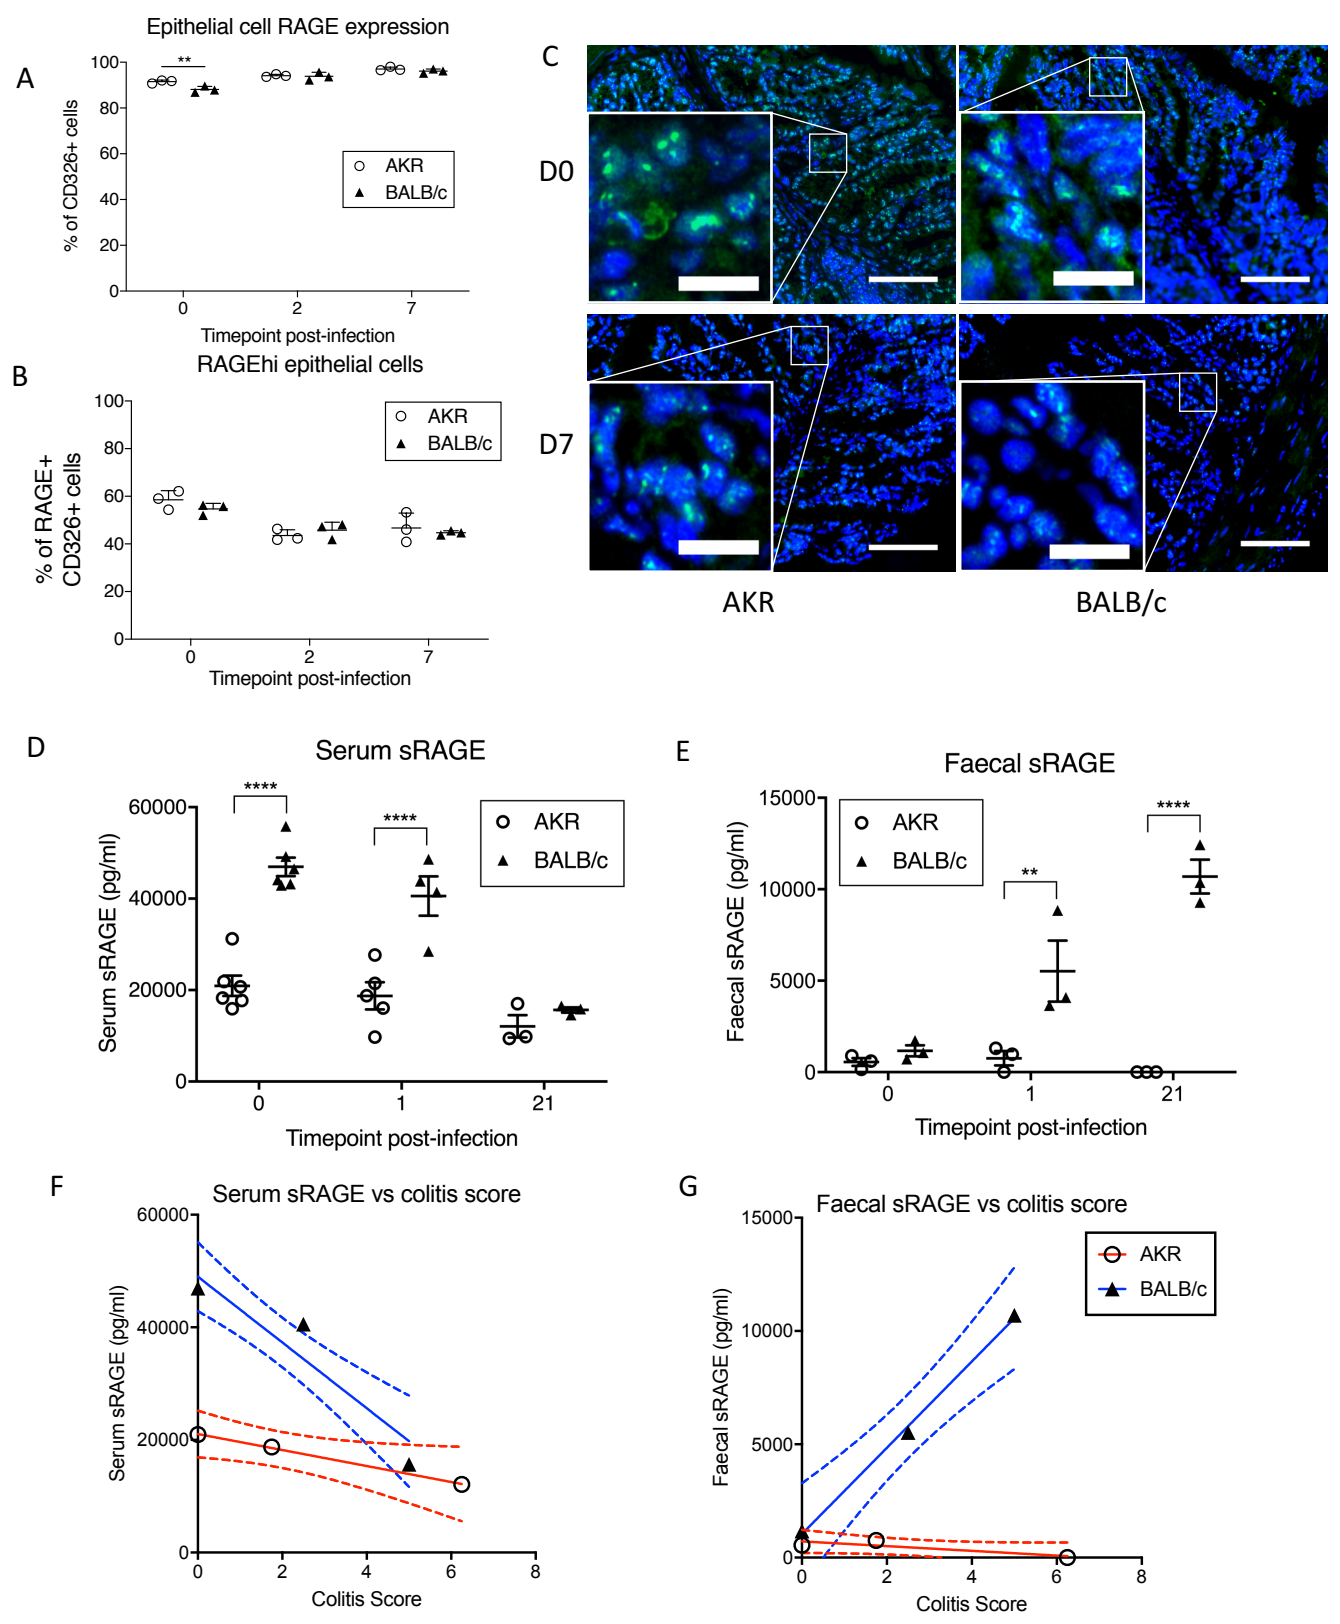

Figure 4

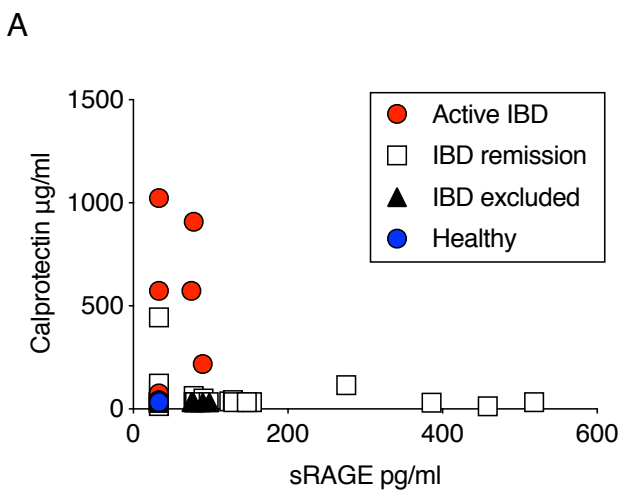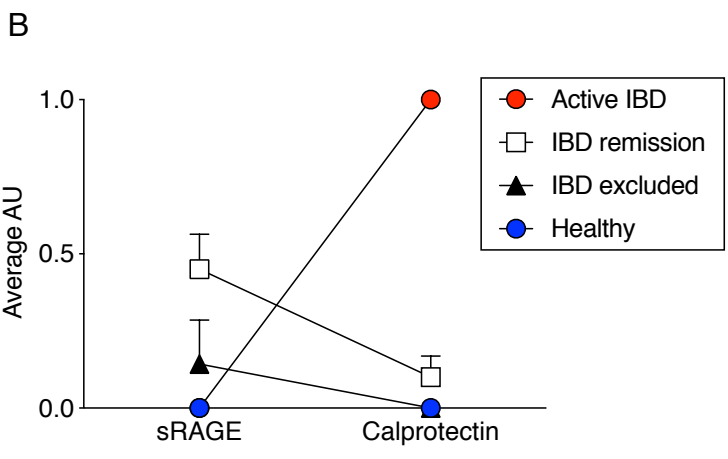

Source: https://www.biorxiv.org/content/10.1101/719310v1.full.pdf
